# Supplementary material for: A Roadmap for the Restoration of Mediterranean Macroalgal Forests
Source: Frontiers journal article supplement (doi:10.3389/fmars.2021.709219), 2021-10-15
Supplement: Table_1.docx [file Table_1.docx]

**SUPPLEMMENTARY MATERIALS**

**A roadmap for the restoration of Mediterranean macroalgal forests**

Cebrian E1*, Tamburello L2, Verdura J1, Guarnieri G3,4, Medrano A5, Linares C5, Galobart C1, Hereu B5, Garrabou J6, Cerrano C7 and Fraschetti S2,4,8

1 Centre d’Estudis Avançats de Blanes (CEAB-CSIC), c/ d’Accés a la Cala St Francesc 14, 17300 Blanes, Spain.

2 Stazione Zoologica Anton Dohrn, Naples, Italy.

3 Department of Biological and Environmental Sciences and Technologies, University of Salento, Lecce, Italy.

4 Consorzio Nazionale Interuniversitario per le Scienze del Mare, Rome, Italy.

5Department of Evolutionary Biology, Ecology and Environmental Sciences, Institut de Recerca de la Biodiversitat (IRBIO), University of Barcelona, Av. Diagonal 643, 08028 Barcelona, Spain.

6 Institut de Ciències del Mar, CSIC, Passeig Marítim de la Barceloneta 37–49, 08003 Barcelona, Spain.

7 Department of Life and Environmental Sciences, Polytechnic University of Marche, Ancona, Italy

8Department of Biology, University of Naples Federico II, Naples, Italy.

**Supplementary Table S1.** Fertility knowledge of the most common *Cysotseira sensu lato* species. Fertility and sterility periods and the first fertility (ages or size) are detailed for the most common *Cysotseira sensu lato* species. The locality and depth of the sampled populations and the source of information are also detailed. The references list is provided.

| **Source** | **Species** | **Locality** | **Depth (m)** | **Fertility** | **Sterility** | **First fertility** |
| --- | --- | --- | --- | --- | --- | --- |
| Gómez-Garreta et al., 2000 | *Gongolaria algeriensis* | Iberian Peninsula | <1 | Summer to winter | Summer and Winter | No data |
| Gómez-Garreta et al., 2000 | *Ericaria amentacea* | Iberian Peninsula | <1 | From spring until autumn | No data | No data |
| Present study; Gòmez-Garreta et al., 2000 | *Gongolaria barbata* | Balearic Islands | <1 | More abundant in spring and early summer than other times in the year | No data | 1 year |
| Marzocchi et al., 2003 | *Gongolaria barbata* | Italy, north Adriatic, Laguna di Venezia | <0,5 | March to June | No data | No data |
| Gómez-Garreta et al., 2000; Gómez-Garreta t al., 1982 | *Ericaria brachycarpa* | Balearic Islands | 0-20 | From October to May, receptacles more developed from February to May) | Rest period during summer | No data |
| Gómez-Garreta et al., 2000 | *Ericaria brachycarpa* | Iberian Peninsula | 0-20 | All year | No data | No data |
| Hoffmann et al.,1992 | *Ericaria brachycarpa* | Corsica (Calvi) | 4 | More abundant in March and June, and less abundant in October (only data for this months) | No data | No data |
| Gómez-Garreta et al., 2000 | *Cystoseira compressa* | Iberian Peninsula, Balearic Islands | 0-3 | From April to November with a peak in July and August | No data | < 1 year |
| Present Study | *Cystoseira compressa* | Catalonia | <1 | May-August | No data | < 1 year |
| Falace et al., 2005 | *Cystoseira compressa* | Golf of Trieste (Izola, Slovenia) | 0-2 | May-July | No data | < 1 year |
| Gómez-Garreta et al., 1982 | *Cystoseira compressa* | Balearic Islands | <1 | April to September with a peak in July and August | October to May | < 1 year |
| Gómez-Garreta et al., 2000; Gómez-Garreta et al., 1982 | *Ericaria crinita* | Balearic Islands | <1 | From autumn until early spring (October to May) with a peak at the end of the winter | April to August, individuals reduced to basal parts | 1 year |
| Present study; Teruel 2019; de Silva 2019 | *Ericaria crinita* | Catalonia | <1 | All year, receptacles best developed and more abundant from April to December with two peaks: April to June and September to November | No data | 1 year |
| Pardi et al., 2000 | *Cystoseira humilis* | Tuscany, Italy | <1 | April and July (only data for April and July) | January | 2 years |
| Gómez-Garreta et al., 2000 | *Cystoseira humilis* | Iberian Peninsula, Balearic Islands | <1 | Spring and summer | No data | No data |
| Present study | *Ericaria mediterranea* | Catalonia | <1 | July and August | October-May | No data |
| Gómez-Garreta et al., 2000 | *Ericaria mediterranea* | Catalonia and Balearic Islands | <1 | Spring and summer | No data | No data |
| Capdevila et al., 2015 | *Ericaria zosteroides* | Catalonia and Columbretes Islands | >15 | March and April | No data | 7 years |
| Gómez-Garreta et al., 2000 | *Ericaria zosteroides* | Iberian Peninsula, Balearic Islands | >15 | Spring and summer | No data | 7 years |
| Serio, 1994; Serio, 1995 | *Ericaria zosteroides* | Sicily, Italy | 23-30 | May to July (immature conceptacle in February and empty in August) | September to January | 7 years |
| Gómez-Garreta et al., 2000 | *Gongolaria elegans* | Iberian Peninsula | No data | All year, receptacles best developed and more abundant in spring | No data | No data |
| Gómez-Garreta et al., 2000; Gómez-Garreta t al., 1982 | *Gongolaria elegans* | Balearic Islands | <1 | Autumn to spring with a peak in spring. | Summer (July and August, individuals reduced to thick trunks. Rest period from early summer to early autumn) | No data |
| Present study | *Gongolaria elegans* | Catalonia | <1 | May to August |  | Between 1 or 2 years |
| Medrano et al., 2020 | *Gongolaria elegans* | Catalonia | 5-15m | End of May to August with a peak in June and July |  | < of 4,5 cm |
| Gómez-Garreta et al., 2000 | *Cystoseira foeniculacea* | Iberian Peninsula, Balearic Islands | <1 | Spring and summer | No data | No data |
| Gómez-Garreta et al., 2000 | *Cystoseira foeniculacea* f. *latirramosa* | Balearic Islands | ~30 | No data | No data | No data |
| Gómez-Garreta et al., 2000 | *Cystoseira foeniculacea* f. *tenuiramosa* | Balearic Islands | <1 | Summer | No data | No data |
| Gómez-Garreta et al., 2000 | *Gongolaria sauvageauana* | Iberian Peninsula | 0-15 | All year, less abundant in autumn | No data | No data |
| Serio, 1994 | *Gongolaria montagnei* | Sicily, Italy | 15-22 | April to July | No data | Between 6 and 7 years |
| Gómez-Garreta et al., 2000 | *Cystoseira montagnei* | Iberian Peninsula, Balearic Islands | 0-30 | Spring and summer | No data | No data |
| Gómez-Garreta et al., 2000 | *Cystoseira montagnei* var. *compressa* | Iberian Peninsula, Balearic Islands | >20 | Summer | No data | No data |
| Gómez-Garreta et al., 2000 | *Ericaria selaginoides* | Iberian Peninsula | 0-3 | All year, receptacles best developed and more abundant in spring and summer | No data | No data |

REFERENCES

Capdevila, P., Linares, C., Aspillaga, E., Navarro, L., Kersting, D., and Hereu, B. (2015). Recruitment patterns in the Mediterranean deep-water alga *Cystoseira zosteroides*. *Marine Biology* 162, 1165–1174.

Falace, A., Zanelli, E., and Bressan, G. (2005). Morphological and reproductive phenology of *Cystoseira compressa* (Esper) Gerloff & Nizamuddin (Fucales, Fucophyceae) in the Gulf of Trieste (north Adriatic Sea). in *Annales: Series Historia Naturalis*, ed. S. and R. C. of the R. of Slovenia (Scientific and Research Center of the Republic of Slovenia), 71–76.

Gómez-Garreta, A., Barceló Martí, M., Gallardo García, T., Pérez-Ruzafa, I., Ribera Sigual, M., and Rull, J. (2000). *Flora phycologica ibérica. I. Fucales*. Servicio de Publicaciones, Universidad de Murcia, Spain: Editum.

Gómez-Garreta, A., Ribera Siguán, M., and Seoane Camba, J. (1982). Estudio fenologico de varias especies del genero *Cystoseira* en Mallorca. *Collectanea Botanica* 13, 841–855.

Hoffmann, L., Renard, R., and Demoulin, V. (1992). Phenology, growht and biomass of *Cystoseira balearica* in Calvi (Corsica). *Marine Ecology Progress Series* 80, 249–254.

Marzocchi, M., Curiel, D., Dri, C., and Mario, S. (2003). Fenologia morfologica e riproduttiva di *Cystoseira barbata* (Stackhouse) C. Agardh var. *barbata* (Fucales, Fucophyceae) nella laguna di Venezia (Nord Adriatico). *Lavori Società Veneziana di Scienze Naturali* 28, 21–23.

Medrano, A., Hereu, B., Mariani, S., Neiva, J., and Escol, M. P. (2020). Ecological traits , genetic diversity and regional distribution of the macroalga *Treptacantha elegans* along the Catalan coast (NW Mediterranean Sea). *Scientific reeports*, 10:19219. doi:10.1038/s41598-020-76066-6.

Pardi, G., Piazzi, L., and Cinelli, F. (2000). Demographic study of a *Cystoseira humilis* Kützing (Fucales: Cystoseiraceae) population in the western Mediterranean. *Botanica Marina* 43, 81–86.

Serio, D. (1994). On the structure, typology and periodism of *Cystoseira spinosa* Sauvageau community and of *Cystoseira zosteroides* C. Agardh community from Eastern coast of Sicily (Mediterranean Sea). *Giornale Botanico Italiano* 128, 941–973.

Serio, D. (1995). Fenologia Morfologica e riproduttiva di *Cystoseira zosteroides* C. Agardh (Fucales, Fucophyceae). *Bullettin of the Gioenia Academy of Natural Sciences of Catania* 28, 45–58.

Silva, O. (2019). Elaboració d’un protocol de restauració dels boscos marins del Mediterrani: cultiu in vitro de reclutes de *Cystoseira crinita*. Master thesis, University of Girona.

Teruel, M. (2019). Estudi de la dinàmica poblacional i de l’efecte d’un impacte puntual produït a una població de *Cystoseira crinita* al Port de la Selva. Master thesis, University of Girona.
